# Supplementary material for: Correction: DNA Methyltransferase Inhibitors Improve the Effect of Chemotherapeutic Agents in SW48 and HT-29 Colorectal Cancer Cells
Source: PubMed Central journal article supplement (PMC4136874; doi:10.1371/journal.pone.0106142), 2014-08-18
Supplement: pone.0106142.s001.pdf [file pone.0106142.s001.pdf]

# SW48 cells

## CCNE1

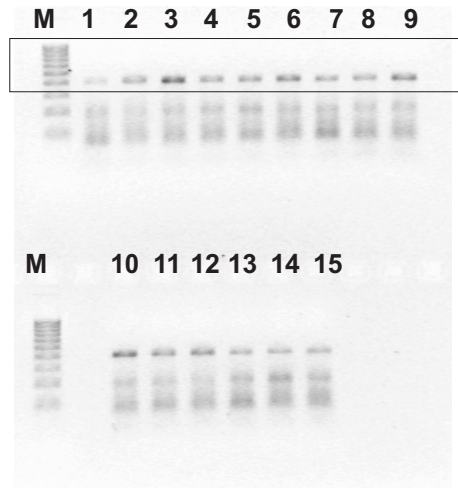

## ATM

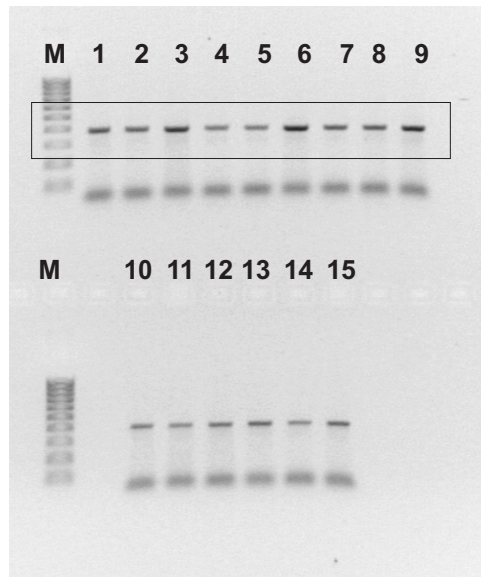

## GAPDH

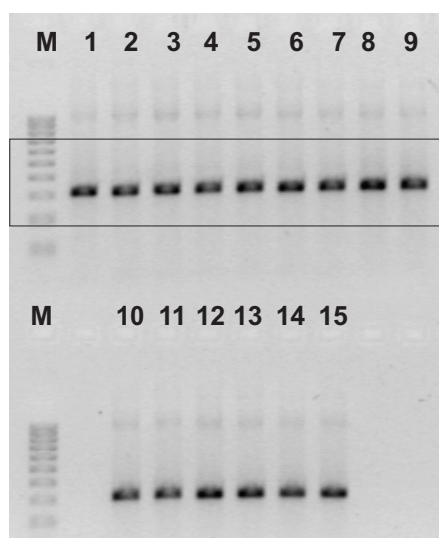

1. Control (not treated)
2. OXA
3. 5-FU
4. DAC
5. ZEB
6. OXA+DAC
7. OXA+ZEB
8. 5-FU+DAC
9. 5-FU+ZEB
