# Supplementary material for: Correction: DNA Methyltransferase Inhibitors Improve the Effect of Chemotherapeutic Agents in SW48 and HT-29 Colorectal Cancer Cells
Source: PubMed Central journal article supplement (PMC4136874; doi:10.1371/journal.pone.0106142), 2014-08-18
Supplement: pone.0106142.s002.pdf [file pone.0106142.s002.pdf]

# HT29 cells

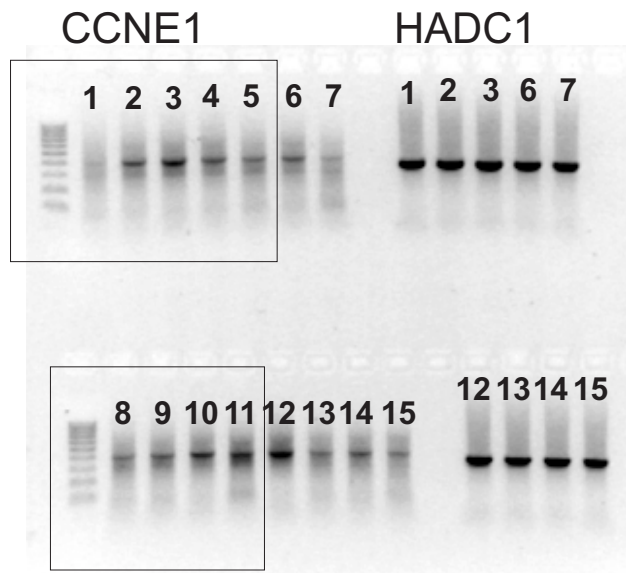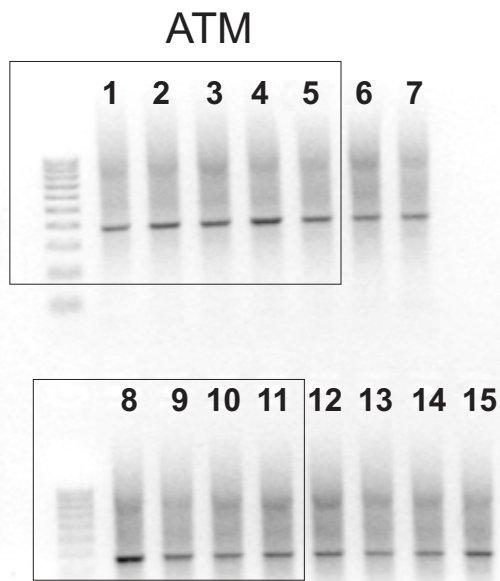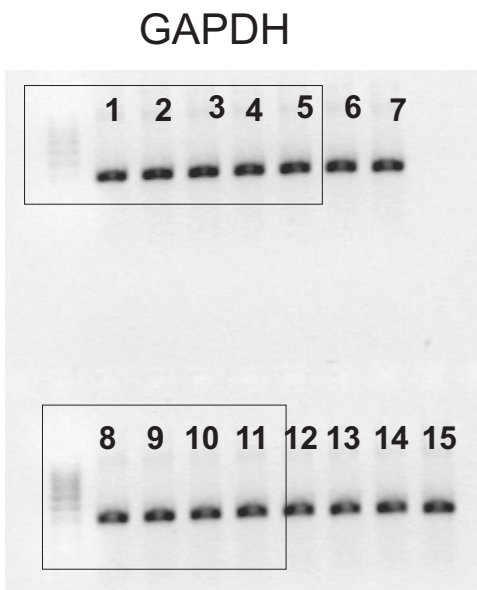

1. Control (not treated)
2. OXA
3. 5-FU
4. DAC
5. ZEB
8. OXA+DAC
9. OXA+ZEB
10. 5-FU+DAC
11. 5-FU+ZEB
